# Supplementary material for: Boosting hot electron flux and catalytic activity at metal–oxide interfaces of PtCo bimetallic nanoparticles
Source: PubMed Central journal article supplement (PMC5993833; doi:10.1038/s41467-018-04713-8), 2018-06-08
Supplement: 41467_2018_4713_MOESM2_ESM.pdf [file 41467_2018_4713_MOESM2_ESM.pdf]

## **Descriptions for Additional Supplementary Files**

File Name: Supplementary Movie 1

Description: Sequence of in-situ transmission electron microscopy images of Pt<sub>3</sub>Co<sub>1</sub> nanoparticles at 125 °C and oxygen gas condition.
